# Supplementary material for: Mycobacterium avium genotype is associated with the therapeutic response to lung infection
Source: PubMed Central journal article supplement (PMC4231998; doi:10.1111/1469-0691.12285), 2013-07-05
Supplement: clm0020-0256-SD1.pdf [file clm0020-0256-SD1.pdf]

**Table S1.** Details of the treatment for subjects with *M. avium* lung infection.

| Detail                       | Responsive disease | Refractory disease | <i>P</i> |
|------------------------------|--------------------|--------------------|----------|
|                              | (n = 30)           | (n = 29)           |          |
| Duration (month)*            | 15 ± 5.4           | 14 ± 6.6           | 0.6      |
| Used drug, n*                | 3.5 ± 0.8          | 3.4 ± 0.9          | 0.71     |
| Regimen†                     |                    |                    | 0.75     |
| CAM+RFP+EB+SM/FQ             | 20                 | 17                 |          |
| CAM+RFP+EB                   | 7                  | 7                  |          |
| CAM+other combinations       | 3                  | 5                  |          |
| Dose of clarithromycin (mg)* | 680 ± 179          | 648 ± 190          | 0.47     |

\*Values represent the means ± standard deviations.

†CAM, clarithromycin; RFP, rifampicin; EB, ethambutol; SM/FQ, streptomycin and/or fluoroquinolone including levofloxacin, moxifloxacin, and gatifloxacin.
